# Supplementary material for: Geographical Distribution of Adolescent Body Height with Respect to Effective Day Length in Japan: An Ecological Analysis
Source: PubMed Central journal article supplement (PMC3515496; doi:10.1371/journal.pone.0050994), 2012-12-05
Supplement: pone.0050994.s002.pdf [file pone.0050994.s002.pdf]

Table S2.

Standardized weight in each prefecture (averaged over a 13-year period from 1996 to 2008, 8- to 12-year-old: Males)

| No. | Prefecture | Male   |         |        |         |        |         |        |         |        |         |
|-----|------------|--------|---------|--------|---------|--------|---------|--------|---------|--------|---------|
|     |            | 8      | (SE)    | 9      | (SE)    | 10     | (SE)    | 11     | (SE)    | 12     | (SE)    |
| 1   | Hokkaido   | 0.181  | (0.053) | 0.205  | (0.046) | 0.194  | (0.054) | 0.177  | (0.069) | 0.201  | (0.031) |
| 2   | Aomori     | 0.306  | (0.062) | 0.303  | (0.071) | 0.289  | (0.059) | 0.294  | (0.059) | 0.309  | (0.046) |
| 3   | Iwate      | 0.195  | (0.057) | 0.201  | (0.046) | 0.199  | (0.055) | 0.210  | (0.035) | 0.190  | (0.045) |
| 4   | Miyagi     | 0.160  | (0.056) | 0.192  | (0.066) | 0.154  | (0.053) | 0.154  | (0.050) | 0.162  | (0.046) |
| 5   | Akita      | 0.276  | (0.063) | 0.297  | (0.049) | 0.262  | (0.071) | 0.221  | (0.068) | 0.245  | (0.021) |
| 6   | Yamagata   | 0.174  | (0.054) | 0.155  | (0.075) | 0.182  | (0.064) | 0.181  | (0.060) | 0.139  | (0.033) |
| 7   | Fukushima  | 0.132  | (0.057) | 0.152  | (0.042) | 0.142  | (0.070) | 0.115  | (0.050) | 0.098  | (0.042) |
| 8   | Ibaraki    | 0.129  | (0.052) | 0.106  | (0.042) | 0.081  | (0.065) | 0.085  | (0.054) | 0.085  | (0.048) |
| 9   | Tochigi    | 0.132  | (0.046) | 0.079  | (0.053) | 0.097  | (0.057) | 0.085  | (0.048) | 0.095  | (0.040) |
| 10  | Gunma      | 0.049  | (0.053) | 0.045  | (0.048) | 0.039  | (0.041) | 0.055  | (0.038) | 0.039  | (0.049) |
| 11  | Saitama    | -0.017 | (0.037) | 0.013  | (0.053) | -0.002 | (0.048) | -0.029 | (0.044) | -0.025 | (0.045) |
| 12  | Chiba      | 0.030  | (0.043) | 0.022  | (0.048) | 0.042  | (0.049) | 0.025  | (0.031) | 0.008  | (0.035) |
| 13  | Tokyo      | 0.002  | (0.049) | 0.012  | (0.056) | 0.016  | (0.038) | 0.041  | (0.045) | 0.039  | (0.045) |
| 14  | Kanagawa   | -0.021 | (0.041) | -0.030 | (0.050) | -0.009 | (0.035) | -0.020 | (0.055) | -0.013 | (0.040) |
| 15  | Niigata    | 0.063  | (0.054) | 0.088  | (0.062) | 0.062  | (0.047) | 0.029  | (0.066) | 0.043  | (0.032) |
| 16  | Toyama     | 0.074  | (0.054) | 0.064  | (0.036) | 0.079  | (0.060) | 0.053  | (0.037) | 0.069  | (0.030) |
| 17  | Ishikawa   | 0.005  | (0.045) | 0.042  | (0.039) | 0.025  | (0.068) | 0.041  | (0.053) | 0.027  | (0.048) |
| 18  | Fukui      | 0.019  | (0.044) | -0.013 | (0.046) | -0.002 | (0.039) | -0.016 | (0.053) | -0.022 | (0.038) |
| 19  | Yamanashi  | -0.011 | (0.052) | -0.008 | (0.057) | 0.012  | (0.048) | -0.033 | (0.052) | -0.013 | (0.064) |
| 20  | Nagano     | -0.072 | (0.038) | -0.092 | (0.038) | -0.059 | (0.044) | -0.070 | (0.044) | -0.052 | (0.031) |
| 21  | Gifu       | -0.049 | (0.057) | -0.036 | (0.038) | -0.051 | (0.046) | -0.071 | (0.053) | -0.076 | (0.038) |
| 22  | Shizuoka   | -0.091 | (0.045) | -0.080 | (0.034) | -0.081 | (0.046) | -0.077 | (0.044) | -0.085 | (0.033) |
| 23  | Aich       | -0.056 | (0.047) | -0.085 | (0.037) | -0.065 | (0.038) | -0.058 | (0.038) | -0.057 | (0.036) |
| 24  | Mie        | -0.030 | (0.053) | -0.047 | (0.039) | -0.030 | (0.036) | -0.020 | (0.039) | -0.040 | (0.039) |
| 25  | Shiga      | -0.074 | (0.051) | -0.078 | (0.049) | -0.115 | (0.031) | -0.116 | (0.059) | -0.128 | (0.039) |
| 26  | Kyoto      | -0.110 | (0.042) | -0.077 | (0.037) | -0.083 | (0.051) | -0.090 | (0.052) | -0.070 | (0.045) |
| 27  | Osaka      | -0.049 | (0.046) | -0.028 | (0.047) | -0.048 | (0.043) | -0.043 | (0.049) | -0.042 | (0.037) |
| 28  | Hyogo      | -0.073 | (0.046) | -0.098 | (0.047) | -0.100 | (0.042) | -0.065 | (0.058) | -0.072 | (0.037) |
| 29  | Nara       | -0.038 | (0.037) | -0.041 | (0.043) | -0.028 | (0.048) | -0.010 | (0.047) | -0.012 | (0.046) |
| 30  | Wakayama   | -0.023 | (0.053) | -0.009 | (0.057) | -0.026 | (0.066) | -0.006 | (0.044) | -0.009 | (0.029) |
| 31  | Tottori    | -0.028 | (0.040) | -0.057 | (0.041) | -0.040 | (0.052) | -0.045 | (0.035) | -0.080 | (0.029) |
| 32  | Shimane    | -0.104 | (0.043) | -0.117 | (0.049) | -0.150 | (0.052) | -0.147 | (0.028) | -0.147 | (0.029) |
| 33  | Okayama    | -0.080 | (0.029) | -0.104 | (0.047) | -0.072 | (0.060) | -0.054 | (0.064) | -0.077 | (0.042) |
| 34  | Hiroshima  | -0.084 | (0.030) | -0.054 | (0.056) | -0.062 | (0.052) | -0.076 | (0.047) | -0.067 | (0.033) |
| 35  | Yamaguchi  | -0.110 | (0.051) | -0.102 | (0.045) | -0.108 | (0.047) | -0.120 | (0.044) | -0.121 | (0.045) |
| 36  | Tokushima  | 0.111  | (0.034) | 0.088  | (0.051) | 0.125  | (0.071) | 0.139  | (0.074) | 0.139  | (0.031) |
| 37  | Kagawa     | -0.040 | (0.035) | 0.002  | (0.033) | 0.012  | (0.046) | 0.003  | (0.061) | 0.063  | (0.036) |
| 38  | Ehime      | -0.045 | (0.053) | -0.048 | (0.049) | -0.053 | (0.069) | -0.052 | (0.033) | -0.020 | (0.038) |
| 39  | Kochi      | -0.071 | (0.044) | -0.055 | (0.051) | -0.049 | (0.064) | -0.035 | (0.057) | -0.006 | (0.058) |
| 40  | Fukuoka    | -0.060 | (0.043) | -0.076 | (0.059) | -0.072 | (0.048) | -0.073 | (0.045) | -0.084 | (0.046) |
| 41  | Saga       | -0.048 | (0.038) | -0.074 | (0.053) | -0.059 | (0.059) | -0.080 | (0.056) | -0.064 | (0.048) |
| 42  | Nagasaki   | -0.068 | (0.054) | -0.067 | (0.063) | -0.096 | (0.054) | -0.072 | (0.060) | -0.120 | (0.041) |
| 43  | Kumamoto   | 0.012  | (0.054) | 0.018  | (0.075) | -0.040 | (0.054) | -0.035 | (0.063) | -0.053 | (0.045) |
| 44  | Oita       | -0.009 | (0.040) | -0.029 | (0.063) | -0.026 | (0.056) | -0.046 | (0.058) | -0.007 | (0.030) |
| 45  | Miyazaki   | -0.024 | (0.065) | -0.040 | (0.062) | -0.051 | (0.059) | -0.027 | (0.065) | -0.063 | (0.060) |
| 46  | Kagoshima  | -0.074 | (0.064) | -0.079 | (0.034) | -0.093 | (0.052) | -0.091 | (0.059) | -0.106 | (0.058) |
| 47  | Okinawa    | -0.063 | (0.041) | -0.082 | (0.073) | -0.087 | (0.059) | -0.039 | (0.046) | -0.016 | (0.032) |

Table S2.

Standardized weight in each prefecture (averaged over a 13-year period from 1996 to 2008, 13- to 17-year-old: Males)

| No. | Prefecture | Male   |         |        |         |        |         |        |         |        |         |
|-----|------------|--------|---------|--------|---------|--------|---------|--------|---------|--------|---------|
|     |            | 13     | (SE)    | 14     | (SE)    | 15     | (SE)    | 16     | (SE)    | 17     | (SE)    |
| 1   | Hokkaido   | 0.199  | (0.043) | 0.157  | (0.036) | 0.095  | (0.051) | 0.122  | (0.039) | 0.113  | (0.078) |
| 2   | Aomori     | 0.272  | (0.054) | 0.258  | (0.028) | 0.212  | (0.033) | 0.251  | (0.077) | 0.240  | (0.079) |
| 3   | Iwate      | 0.136  | (0.034) | 0.143  | (0.056) | 0.133  | (0.050) | 0.121  | (0.067) | 0.131  | (0.047) |
| 4   | Miyagi     | 0.136  | (0.034) | 0.116  | (0.050) | 0.110  | (0.050) | 0.110  | (0.054) | 0.111  | (0.060) |
| 5   | Akita      | 0.225  | (0.054) | 0.195  | (0.052) | 0.201  | (0.058) | 0.245  | (0.054) | 0.228  | (0.050) |
| 6   | Yamagata   | 0.110  | (0.032) | 0.125  | (0.035) | 0.127  | (0.072) | 0.132  | (0.056) | 0.126  | (0.046) |
| 7   | Fukushima  | 0.110  | (0.060) | 0.069  | (0.041) | 0.111  | (0.066) | 0.085  | (0.058) | 0.086  | (0.048) |
| 8   | Ibaraki    | 0.043  | (0.023) | 0.064  | (0.039) | 0.055  | (0.051) | 0.064  | (0.048) | 0.037  | (0.040) |
| 9   | Tochigi    | 0.034  | (0.037) | 0.055  | (0.048) | 0.077  | (0.053) | 0.083  | (0.042) | 0.087  | (0.079) |
| 10  | Gunma      | 0.036  | (0.034) | 0.035  | (0.025) | 0.071  | (0.071) | 0.046  | (0.063) | 0.037  | (0.075) |
| 11  | Saitama    | -0.039 | (0.039) | -0.029 | (0.041) | -0.014 | (0.046) | 0.005  | (0.048) | -0.022 | (0.059) |
| 12  | Chiba      | -0.014 | (0.029) | 0.002  | (0.032) | 0.047  | (0.066) | 0.018  | (0.042) | 0.019  | (0.051) |
| 13  | Tokyo      | 0.082  | (0.039) | 0.056  | (0.036) | 0.046  | (0.040) | 0.026  | (0.034) | 0.031  | (0.053) |
| 14  | Kanagawa   | -0.020 | (0.035) | 0.014  | (0.025) | -0.005 | (0.045) | -0.012 | (0.045) | -0.030 | (0.051) |
| 15  | Niigata    | 0.052  | (0.042) | 0.050  | (0.044) | 0.044  | (0.033) | 0.029  | (0.040) | 0.050  | (0.043) |
| 16  | Toyama     | 0.065  | (0.032) | 0.073  | (0.053) | 0.091  | (0.040) | 0.050  | (0.040) | 0.047  | (0.059) |
| 17  | Ishikawa   | 0.019  | (0.043) | 0.030  | (0.043) | 0.074  | (0.043) | 0.079  | (0.061) | 0.078  | (0.049) |
| 18  | Fukui      | -0.023 | (0.041) | -0.012 | (0.034) | 0.030  | (0.045) | 0.057  | (0.053) | 0.016  | (0.034) |
| 19  | Yamanashi  | 0.000  | (0.046) | 0.001  | (0.029) | 0.019  | (0.037) | 0.027  | (0.071) | 0.032  | (0.048) |
| 20  | Nagano     | -0.050 | (0.038) | -0.054 | (0.038) | -0.046 | (0.056) | -0.025 | (0.071) | -0.010 | (0.042) |
| 21  | Gifu       | -0.064 | (0.043) | -0.075 | (0.034) | -0.074 | (0.034) | -0.074 | (0.054) | -0.091 | (0.046) |
| 22  | Shizuoka   | -0.099 | (0.044) | -0.094 | (0.053) | -0.082 | (0.058) | -0.095 | (0.050) | -0.086 | (0.039) |
| 23  | Aich       | -0.035 | (0.043) | -0.027 | (0.047) | -0.043 | (0.050) | -0.063 | (0.052) | -0.069 | (0.038) |
| 24  | Mie        | -0.058 | (0.033) | -0.057 | (0.032) | -0.033 | (0.072) | -0.042 | (0.049) | -0.064 | (0.040) |
| 25  | Shiga      | -0.080 | (0.030) | -0.065 | (0.035) | -0.047 | (0.064) | -0.033 | (0.045) | -0.011 | (0.040) |
| 26  | Kyoto      | -0.075 | (0.043) | -0.043 | (0.049) | -0.079 | (0.059) | -0.049 | (0.057) | -0.052 | (0.048) |
| 27  | Osaka      | 0.002  | (0.026) | 0.002  | (0.056) | -0.012 | (0.068) | -0.015 | (0.028) | 0.012  | (0.049) |
| 28  | Hyogo      | -0.093 | (0.036) | -0.066 | (0.029) | -0.067 | (0.050) | -0.053 | (0.047) | -0.039 | (0.044) |
| 29  | Nara       | -0.007 | (0.035) | 0.007  | (0.031) | -0.011 | (0.039) | -0.022 | (0.067) | -0.034 | (0.064) |
| 30  | Wakayama   | 0.038  | (0.049) | 0.032  | (0.037) | 0.026  | (0.032) | -0.006 | (0.059) | 0.020  | (0.050) |
| 31  | Tottori    | -0.017 | (0.030) | -0.052 | (0.045) | -0.068 | (0.055) | -0.061 | (0.050) | -0.074 | (0.042) |
| 32  | Shimane    | -0.151 | (0.034) | -0.140 | (0.041) | -0.126 | (0.036) | -0.095 | (0.034) | -0.056 | (0.036) |
| 33  | Okayama    | -0.066 | (0.048) | -0.064 | (0.047) | -0.060 | (0.049) | -0.072 | (0.042) | -0.050 | (0.069) |
| 34  | Hiroshima  | -0.065 | (0.050) | -0.052 | (0.033) | -0.098 | (0.038) | -0.094 | (0.046) | -0.076 | (0.040) |
| 35  | Yamaguchi  | -0.163 | (0.047) | -0.152 | (0.027) | -0.154 | (0.045) | -0.156 | (0.049) | -0.142 | (0.037) |
| 36  | Tokushima  | 0.136  | (0.027) | 0.128  | (0.046) | 0.126  | (0.063) | 0.123  | (0.037) | 0.051  | (0.052) |
| 37  | Kagawa     | 0.024  | (0.042) | 0.033  | (0.015) | 0.035  | (0.030) | 0.020  | (0.047) | -0.001 | (0.046) |
| 38  | Ehime      | -0.034 | (0.030) | -0.055 | (0.038) | -0.055 | (0.061) | -0.049 | (0.070) | -0.041 | (0.055) |
| 39  | Kochi      | -0.048 | (0.027) | -0.053 | (0.042) | -0.079 | (0.045) | -0.056 | (0.073) | -0.082 | (0.059) |
| 40  | Fukuoka    | -0.087 | (0.036) | -0.094 | (0.050) | -0.073 | (0.054) | -0.074 | (0.052) | -0.077 | (0.049) |
| 41  | Saga       | -0.083 | (0.054) | -0.089 | (0.033) | -0.059 | (0.066) | -0.050 | (0.051) | -0.036 | (0.050) |
| 42  | Nagasaki   | -0.098 | (0.035) | -0.100 | (0.040) | -0.049 | (0.041) | -0.048 | (0.050) | -0.039 | (0.053) |
| 43  | Kumamoto   | -0.056 | (0.040) | -0.058 | (0.048) | -0.071 | (0.058) | -0.051 | (0.054) | -0.055 | (0.053) |
| 44  | Oita       | -0.012 | (0.044) | -0.008 | (0.036) | 0.004  | (0.048) | 0.033  | (0.049) | 0.021  | (0.051) |
| 45  | Miyazaki   | -0.084 | (0.053) | -0.095 | (0.052) | -0.051 | (0.051) | -0.085 | (0.045) | -0.068 | (0.074) |
| 46  | Kagoshima  | -0.099 | (0.042) | -0.105 | (0.055) | -0.079 | (0.045) | -0.040 | (0.037) | -0.039 | (0.050) |
| 47  | Okinawa    | -0.026 | (0.054) | -0.045 | (0.050) | -0.107 | (0.027) | -0.135 | (0.046) | -0.122 | (0.055) |

Table S2.

Standardized weight in each prefecture (averaged over a 13-year period from 1996 to 2008, 8- to 12-year-old: Females)

| No. | Prefecture | Female |         |        |         |        |         |        |         |        |         |
|-----|------------|--------|---------|--------|---------|--------|---------|--------|---------|--------|---------|
|     |            | 8      | (SE)    | 9      | (SE)    | 10     | (SE)    | 11     | (SE)    | 12     | (SE)    |
| 1   | Hokkaido   | 0.144  | (0.065) | 0.143  | (0.059) | 0.176  | (0.063) | 0.126  | (0.058) | 0.112  | (0.031) |
| 2   | Aomori     | 0.312  | (0.078) | 0.319  | (0.072) | 0.314  | (0.072) | 0.236  | (0.051) | 0.238  | (0.028) |
| 3   | Iwate      | 0.190  | (0.055) | 0.237  | (0.060) | 0.213  | (0.050) | 0.191  | (0.060) | 0.173  | (0.043) |
| 4   | Miyagi     | 0.175  | (0.047) | 0.168  | (0.059) | 0.181  | (0.049) | 0.153  | (0.051) | 0.154  | (0.040) |
| 5   | Akita      | 0.250  | (0.045) | 0.251  | (0.044) | 0.214  | (0.046) | 0.179  | (0.048) | 0.195  | (0.040) |
| 6   | Yamagata   | 0.168  | (0.040) | 0.157  | (0.052) | 0.126  | (0.041) | 0.099  | (0.036) | 0.120  | (0.027) |
| 7   | Fukushima  | 0.130  | (0.050) | 0.120  | (0.044) | 0.137  | (0.061) | 0.137  | (0.054) | 0.114  | (0.047) |
| 8   | Ibaraki    | 0.094  | (0.049) | 0.071  | (0.068) | 0.086  | (0.035) | 0.074  | (0.057) | 0.098  | (0.036) |
| 9   | Tochigi    | 0.117  | (0.050) | 0.103  | (0.049) | 0.104  | (0.040) | 0.092  | (0.045) | 0.118  | (0.031) |
| 10  | Gunma      | 0.047  | (0.046) | 0.032  | (0.035) | 0.047  | (0.073) | 0.036  | (0.063) | 0.050  | (0.036) |
| 11  | Saitama    | 0.009  | (0.060) | -0.001 | (0.030) | -0.001 | (0.050) | 0.003  | (0.043) | -0.003 | (0.029) |
| 12  | Chiba      | 0.016  | (0.041) | 0.010  | (0.045) | 0.031  | (0.056) | 0.028  | (0.054) | 0.013  | (0.023) |
| 13  | Tokyo      | -0.003 | (0.040) | -0.008 | (0.038) | -0.019 | (0.044) | -0.008 | (0.040) | -0.017 | (0.036) |
| 14  | Kanagawa   | -0.050 | (0.036) | -0.035 | (0.039) | -0.033 | (0.043) | -0.023 | (0.045) | -0.037 | (0.048) |
| 15  | Niigata    | 0.066  | (0.042) | 0.042  | (0.046) | 0.030  | (0.048) | 0.039  | (0.042) | 0.043  | (0.045) |
| 16  | Toyama     | 0.091  | (0.048) | 0.084  | (0.036) | 0.081  | (0.040) | 0.066  | (0.047) | 0.056  | (0.041) |
| 17  | Ishikawa   | 0.041  | (0.059) | 0.026  | (0.065) | 0.036  | (0.053) | 0.026  | (0.039) | 0.049  | (0.039) |
| 18  | Fukui      | 0.001  | (0.032) | 0.013  | (0.051) | 0.016  | (0.034) | -0.013 | (0.038) | 0.008  | (0.033) |
| 19  | Yamanashi  | -0.022 | (0.062) | -0.024 | (0.054) | -0.021 | (0.055) | -0.060 | (0.054) | -0.009 | (0.039) |
| 20  | Nagano     | -0.092 | (0.038) | -0.086 | (0.049) | -0.095 | (0.035) | -0.091 | (0.049) | -0.041 | (0.038) |
| 21  | Gifu       | -0.068 | (0.049) | -0.070 | (0.038) | -0.083 | (0.050) | -0.055 | (0.047) | -0.065 | (0.033) |
| 22  | Shizuoka   | -0.093 | (0.049) | -0.062 | (0.055) | -0.067 | (0.043) | -0.076 | (0.041) | -0.055 | (0.052) |
| 23  | Aich       | -0.095 | (0.036) | -0.091 | (0.036) | -0.095 | (0.058) | -0.103 | (0.037) | -0.083 | (0.028) |
| 24  | Mie        | -0.034 | (0.054) | -0.038 | (0.023) | -0.046 | (0.047) | -0.013 | (0.051) | -0.063 | (0.035) |
| 25  | Shiga      | -0.063 | (0.044) | -0.084 | (0.060) | -0.088 | (0.038) | -0.088 | (0.037) | -0.077 | (0.029) |
| 26  | Kyoto      | -0.092 | (0.038) | -0.079 | (0.039) | -0.062 | (0.049) | -0.063 | (0.053) | -0.086 | (0.030) |
| 27  | Osaka      | -0.039 | (0.047) | -0.050 | (0.038) | -0.033 | (0.049) | -0.029 | (0.059) | -0.040 | (0.039) |
| 28  | Hyogo      | -0.064 | (0.038) | -0.057 | (0.040) | -0.095 | (0.059) | -0.106 | (0.041) | -0.077 | (0.025) |
| 29  | Nara       | -0.028 | (0.058) | -0.045 | (0.065) | -0.027 | (0.062) | -0.048 | (0.044) | -0.030 | (0.049) |
| 30  | Wakayama   | -0.015 | (0.042) | 0.016  | (0.048) | 0.004  | (0.045) | 0.003  | (0.054) | 0.009  | (0.066) |
| 31  | Tottori    | -0.011 | (0.045) | -0.003 | (0.049) | -0.015 | (0.062) | -0.025 | (0.053) | -0.022 | (0.043) |
| 32  | Shimane    | -0.070 | (0.080) | -0.075 | (0.056) | -0.077 | (0.064) | -0.088 | (0.039) | -0.082 | (0.032) |
| 33  | Okayama    | -0.062 | (0.036) | -0.062 | (0.048) | -0.074 | (0.041) | -0.058 | (0.063) | -0.050 | (0.050) |
| 34  | Hiroshima  | -0.040 | (0.054) | -0.067 | (0.046) | -0.040 | (0.045) | -0.029 | (0.057) | -0.028 | (0.029) |
| 35  | Yamaguchi  | -0.079 | (0.047) | -0.102 | (0.056) | -0.100 | (0.046) | -0.075 | (0.060) | -0.100 | (0.034) |
| 36  | Tokushima  | 0.091  | (0.058) | 0.091  | (0.047) | 0.118  | (0.067) | 0.109  | (0.046) | 0.109  | (0.031) |
| 37  | Kagawa     | -0.024 | (0.062) | -0.014 | (0.060) | 0.014  | (0.034) | -0.004 | (0.062) | 0.045  | (0.029) |
| 38  | Ehime      | -0.058 | (0.031) | -0.026 | (0.042) | -0.046 | (0.044) | -0.058 | (0.056) | 0.005  | (0.033) |
| 39  | Kochi      | -0.061 | (0.044) | -0.015 | (0.069) | -0.024 | (0.056) | 0.000  | (0.046) | 0.023  | (0.053) |
| 40  | Fukuoka    | -0.028 | (0.053) | -0.033 | (0.057) | -0.026 | (0.054) | -0.027 | (0.055) | -0.043 | (0.035) |
| 41  | Saga       | -0.029 | (0.042) | -0.008 | (0.051) | 0.000  | (0.043) | -0.001 | (0.079) | 0.003  | (0.047) |
| 42  | Nagasaki   | -0.043 | (0.050) | -0.041 | (0.054) | -0.065 | (0.047) | -0.064 | (0.038) | -0.048 | (0.053) |
| 43  | Kumamoto   | 0.033  | (0.058) | 0.024  | (0.053) | 0.002  | (0.066) | 0.015  | (0.049) | 0.003  | (0.051) |
| 44  | Oita       | 0.006  | (0.047) | 0.011  | (0.084) | 0.016  | (0.050) | -0.009 | (0.059) | 0.002  | (0.045) |
| 45  | Miyazaki   | 0.006  | (0.065) | -0.029 | (0.054) | 0.003  | (0.058) | 0.017  | (0.062) | 0.000  | (0.057) |
| 46  | Kagoshima  | -0.059 | (0.066) | -0.065 | (0.045) | -0.045 | (0.050) | -0.048 | (0.067) | -0.024 | (0.045) |
| 47  | Okinawa    | -0.016 | (0.058) | 0.013  | (0.062) | 0.071  | (0.060) | 0.032  | (0.035) | 0.020  | (0.045) |

Table S2.

Standardized Zeight in each prefecture (averaged over a 13-year period from 1996 to 2008, 13- to 17-year-old: Females)

| No. | Prefecture | Female |         |        |         |        |         |        |         |        |         |
|-----|------------|--------|---------|--------|---------|--------|---------|--------|---------|--------|---------|
|     |            | 13     | (SE)    | 14     | (SE)    | 15     | (SE)    | 16     | (SE)    | 17     | (SE)    |
| 1   | Hokkaido   | 0.104  | (0.035) | 0.068  | (0.046) | 0.058  | (0.054) | 0.065  | (0.069) | 0.066  | (0.048) |
| 2   | Aomori     | 0.252  | (0.057) | 0.231  | (0.030) | 0.200  | (0.058) | 0.186  | (0.075) | 0.168  | (0.055) |
| 3   | Iwate      | 0.137  | (0.043) | 0.135  | (0.048) | 0.157  | (0.040) | 0.169  | (0.049) | 0.197  | (0.052) |
| 4   | Miyagi     | 0.139  | (0.035) | 0.139  | (0.040) | 0.147  | (0.079) | 0.139  | (0.067) | 0.154  | (0.064) |
| 5   | Akita      | 0.192  | (0.044) | 0.171  | (0.032) | 0.180  | (0.054) | 0.154  | (0.057) | 0.156  | (0.064) |
| 6   | Yamagata   | 0.128  | (0.029) | 0.142  | (0.032) | 0.186  | (0.081) | 0.186  | (0.052) | 0.189  | (0.063) |
| 7   | Fukushima  | 0.108  | (0.043) | 0.123  | (0.056) | 0.148  | (0.058) | 0.179  | (0.057) | 0.128  | (0.055) |
| 8   | Ibaraki    | 0.059  | (0.036) | 0.090  | (0.040) | 0.103  | (0.047) | 0.074  | (0.043) | 0.082  | (0.050) |
| 9   | Tochigi    | 0.104  | (0.031) | 0.121  | (0.045) | 0.119  | (0.047) | 0.111  | (0.081) | 0.103  | (0.072) |
| 10  | Gunma      | 0.026  | (0.038) | 0.052  | (0.032) | 0.060  | (0.077) | 0.066  | (0.085) | 0.074  | (0.059) |
| 11  | Saitama    | 0.011  | (0.043) | 0.025  | (0.036) | 0.047  | (0.048) | 0.044  | (0.056) | 0.004  | (0.055) |
| 12  | Chiba      | 0.035  | (0.032) | 0.028  | (0.038) | 0.052  | (0.046) | 0.025  | (0.057) | 0.000  | (0.044) |
| 13  | Tokyo      | 0.001  | (0.033) | -0.037 | (0.036) | -0.040 | (0.053) | -0.053 | (0.034) | -0.041 | (0.065) |
| 14  | Kanagawa   | -0.030 | (0.034) | -0.045 | (0.035) | -0.072 | (0.037) | -0.068 | (0.046) | -0.052 | (0.058) |
| 15  | Niigata    | 0.024  | (0.048) | 0.048  | (0.026) | 0.027  | (0.054) | 0.056  | (0.032) | 0.066  | (0.054) |
| 16  | Toyama     | 0.065  | (0.028) | 0.058  | (0.040) | 0.092  | (0.059) | 0.095  | (0.049) | 0.069  | (0.056) |
| 17  | Ishikawa   | 0.029  | (0.031) | 0.027  | (0.045) | 0.046  | (0.039) | 0.081  | (0.056) | 0.048  | (0.038) |
| 18  | Fukui      | 0.027  | (0.027) | 0.044  | (0.029) | 0.059  | (0.078) | 0.062  | (0.048) | 0.059  | (0.043) |
| 19  | Yamanashi  | -0.004 | (0.036) | 0.000  | (0.046) | 0.019  | (0.039) | -0.013 | (0.052) | 0.002  | (0.054) |
| 20  | Nagano     | -0.023 | (0.046) | 0.006  | (0.027) | 0.001  | (0.040) | -0.011 | (0.053) | -0.008 | (0.045) |
| 21  | Gifu       | -0.067 | (0.035) | -0.052 | (0.050) | -0.099 | (0.043) | -0.080 | (0.056) | -0.121 | (0.047) |
| 22  | Shizuoka   | -0.056 | (0.042) | -0.030 | (0.036) | -0.027 | (0.062) | -0.074 | (0.054) | -0.039 | (0.043) |
| 23  | Aich       | -0.067 | (0.026) | -0.054 | (0.021) | -0.093 | (0.043) | -0.077 | (0.053) | -0.082 | (0.041) |
| 24  | Mie        | -0.053 | (0.029) | -0.086 | (0.042) | -0.054 | (0.059) | -0.070 | (0.062) | -0.045 | (0.061) |
| 25  | Shiga      | -0.057 | (0.026) | -0.038 | (0.026) | -0.009 | (0.034) | 0.040  | (0.043) | 0.046  | (0.042) |
| 26  | Kyoto      | -0.068 | (0.044) | -0.064 | (0.029) | -0.040 | (0.060) | -0.028 | (0.038) | -0.029 | (0.056) |
| 27  | Osaka      | -0.002 | (0.024) | -0.026 | (0.051) | -0.024 | (0.038) | -0.017 | (0.038) | -0.009 | (0.053) |
| 28  | Hyogo      | -0.063 | (0.035) | -0.042 | (0.037) | -0.007 | (0.052) | -0.040 | (0.046) | -0.017 | (0.052) |
| 29  | Nara       | -0.021 | (0.031) | -0.037 | (0.040) | 0.013  | (0.049) | -0.017 | (0.067) | 0.007  | (0.064) |
| 30  | Wakayama   | -0.004 | (0.039) | -0.018 | (0.036) | 0.012  | (0.058) | 0.020  | (0.064) | 0.006  | (0.081) |
| 31  | Tottori    | -0.006 | (0.046) | 0.000  | (0.042) | -0.026 | (0.046) | -0.026 | (0.065) | -0.015 | (0.035) |
| 32  | Shimane    | -0.087 | (0.038) | -0.075 | (0.034) | -0.069 | (0.052) | -0.065 | (0.061) | -0.054 | (0.055) |
| 33  | Okayama    | -0.058 | (0.039) | -0.047 | (0.029) | -0.034 | (0.065) | -0.046 | (0.041) | -0.041 | (0.033) |
| 34  | Hiroshima  | -0.047 | (0.035) | -0.060 | (0.043) | -0.071 | (0.077) | -0.062 | (0.058) | -0.039 | (0.056) |
| 35  | Yamaguchi  | -0.121 | (0.028) | -0.100 | (0.040) | -0.101 | (0.053) | -0.112 | (0.076) | -0.110 | (0.057) |
| 36  | Tokushima  | 0.110  | (0.051) | 0.096  | (0.033) | 0.045  | (0.074) | 0.069  | (0.051) | 0.046  | (0.055) |
| 37  | Kagawa     | 0.031  | (0.029) | 0.054  | (0.045) | 0.017  | (0.070) | 0.008  | (0.049) | -0.004 | (0.048) |
| 38  | Ehime      | -0.020 | (0.041) | -0.007 | (0.054) | -0.021 | (0.040) | -0.016 | (0.041) | 0.004  | (0.062) |
| 39  | Kochi      | -0.015 | (0.045) | -0.063 | (0.052) | -0.058 | (0.040) | -0.041 | (0.039) | -0.065 | (0.061) |
| 40  | Fukuoka    | -0.052 | (0.032) | -0.074 | (0.027) | -0.063 | (0.066) | -0.032 | (0.063) | -0.060 | (0.049) |
| 41  | Saga       | -0.003 | (0.041) | -0.017 | (0.031) | 0.002  | (0.047) | 0.018  | (0.065) | 0.013  | (0.046) |
| 42  | Nagasaki   | -0.018 | (0.056) | -0.013 | (0.023) | -0.027 | (0.073) | -0.005 | (0.064) | -0.019 | (0.057) |
| 43  | Kumamoto   | -0.022 | (0.047) | -0.023 | (0.051) | -0.021 | (0.054) | -0.013 | (0.063) | -0.011 | (0.051) |
| 44  | Oita       | -0.005 | (0.062) | -0.012 | (0.052) | 0.014  | (0.049) | -0.011 | (0.055) | 0.008  | (0.061) |
| 45  | Miyazaki   | -0.022 | (0.043) | -0.026 | (0.044) | -0.002 | (0.065) | -0.012 | (0.061) | -0.040 | (0.066) |
| 46  | Kagoshima  | -0.033 | (0.046) | -0.022 | (0.042) | -0.034 | (0.035) | -0.002 | (0.033) | 0.010  | (0.051) |
| 47  | Okinawa    | -0.051 | (0.048) | -0.105 | (0.051) | -0.168 | (0.047) | -0.236 | (0.068) | -0.238 | (0.066) |
