# Supplementary material for: Geographical Distribution of Adolescent Body Height with Respect to Effective Day Length in Japan: An Ecological Analysis
Source: PubMed Central journal article supplement (PMC3515496; doi:10.1371/journal.pone.0050994), 2012-12-05
Supplement: pone.0050994.s003.pdf [file pone.0050994.s003.pdf]

Table S3.

Population-weighted average climatic value in each prefecture

| No. | Prefecture | TEMP | SOLA | SUN  | 1000  | 2000  | 3000  | 4000  | 5000  | 10000 |
|-----|------------|------|------|------|-------|-------|-------|-------|-------|-------|
| 1   | Hokkaido   | 7.1  | 12.1 | 1783 | 11.62 | 11.25 | 10.84 | 10.47 | 10.10 | 8.21  |
| 2   | Aomori     | 9.7  | 12.2 | 1761 | 11.63 | 11.24 | 10.86 | 10.49 | 10.11 | 8.23  |
| 3   | Iwate      | 9.8  | 12.1 | 1727 | 11.62 | 11.25 | 10.89 | 10.52 | 10.14 | 8.30  |
| 4   | Miyagi     | 11.5 | 12.3 | 1859 | 11.65 | 11.30 | 10.95 | 10.60 | 10.24 | 8.47  |
| 5   | Akita      | 10.5 | 11.8 | 1584 | 11.61 | 11.19 | 10.80 | 10.42 | 10.03 | 8.05  |
| 6   | Yamagata   | 11.0 | 12.0 | 1601 | 11.62 | 11.24 | 10.85 | 10.48 | 10.09 | 8.19  |
| 7   | Fukushima  | 11.6 | 12.8 | 1836 | 11.64 | 11.32 | 10.97 | 10.63 | 10.29 | 8.56  |
| 8   | Ibaraki    | 13.5 | 12.8 | 1884 | 11.65 | 11.32 | 10.98 | 10.64 | 10.30 | 8.64  |
| 9   | Tochigi    | 12.9 | 12.6 | 1954 | 11.65 | 11.31 | 10.96 | 10.63 | 10.31 | 8.60  |
| 10  | Gunma      | 13.7 | 12.7 | 2011 | 11.65 | 11.33 | 10.97 | 10.66 | 10.31 | 8.63  |
| 11  | Saitama    | 14.4 | 12.3 | 1893 | 11.64 | 11.30 | 10.95 | 10.60 | 10.26 | 8.53  |
| 12  | Chiba      | 14.7 | 12.3 | 1852 | 11.64 | 11.29 | 10.95 | 10.59 | 10.24 | 8.48  |
| 13  | Tokyo      | 15.0 | 12.1 | 1858 | 11.64 | 11.30 | 10.93 | 10.57 | 10.21 | 8.44  |
| 14  | Kanagawa   | 15.1 | 12.3 | 1883 | 11.64 | 11.29 | 10.94 | 10.59 | 10.24 | 8.49  |
| 15  | Niigata    | 12.6 | 11.7 | 1570 | 11.60 | 11.19 | 10.82 | 10.42 | 10.03 | 8.06  |
| 16  | Toyama     | 13.3 | 12.0 | 1582 | 11.62 | 11.25 | 10.85 | 10.49 | 10.11 | 8.21  |
| 17  | Ishikawa   | 13.8 | 12.3 | 1654 | 11.63 | 11.25 | 10.89 | 10.49 | 10.12 | 8.27  |
| 18  | Fukui      | 13.9 | 12.1 | 1589 | 11.62 | 11.25 | 10.88 | 10.51 | 10.14 | 8.28  |
| 19  | Yamanashi  | 12.8 | 13.5 | 2044 | 11.69 | 11.35 | 11.06 | 10.74 | 10.43 | 8.84  |
| 20  | Nagano     | 10.7 | 13.6 | 1956 | 11.69 | 11.36 | 11.05 | 10.73 | 10.42 | 8.82  |
| 21  | Gifu       | 14.0 | 13.1 | 1950 | 11.67 | 11.34 | 11.00 | 10.68 | 10.34 | 8.71  |
| 22  | Shizuoka   | 15.5 | 13.3 | 1999 | 11.69 | 11.36 | 11.04 | 10.72 | 10.39 | 8.79  |
| 23  | Aich       | 15.2 | 13.3 | 2067 | 11.69 | 11.35 | 11.04 | 10.72 | 10.39 | 8.79  |
| 24  | Mie        | 14.8 | 12.8 | 1960 | 11.66 | 11.33 | 10.99 | 10.66 | 10.32 | 8.64  |
| 25  | Shiga      | 13.9 | 12.4 | 1774 | 11.62 | 11.28 | 10.93 | 10.57 | 10.21 | 8.44  |
| 26  | Kyoto      | 14.7 | 12.1 | 1743 | 11.63 | 11.28 | 10.90 | 10.56 | 10.19 | 8.38  |
| 27  | Osaka      | 15.7 | 12.5 | 1952 | 11.64 | 11.29 | 10.95 | 10.61 | 10.27 | 8.50  |
| 28  | Hyogo      | 14.9 | 12.6 | 1921 | 11.64 | 11.29 | 10.97 | 10.62 | 10.27 | 8.54  |
| 29  | Nara       | 14.4 | 12.5 | 1830 | 11.64 | 11.29 | 10.94 | 10.59 | 10.24 | 8.46  |
| 30  | Wakayama   | 15.6 | 13.0 | 1965 | 11.65 | 11.32 | 10.99 | 10.66 | 10.32 | 8.66  |
| 31  | Tottori    | 14.0 | 12.4 | 1694 | 11.64 | 11.28 | 10.90 | 10.55 | 10.18 | 8.37  |
| 32  | Shimane    | 14.0 | 12.7 | 1728 | 11.64 | 11.29 | 10.91 | 10.57 | 10.22 | 8.44  |
| 33  | Okayama    | 14.5 | 13.2 | 1970 | 11.68 | 11.34 | 11.01 | 10.68 | 10.35 | 8.70  |
| 34  | Hiroshima  | 14.6 | 13.3 | 1932 | 11.69 | 11.35 | 11.02 | 10.71 | 10.37 | 8.77  |
| 35  | Yamaguchi  | 15.0 | 13.5 | 1977 | 11.68 | 11.34 | 11.04 | 10.70 | 10.39 | 8.77  |
| 36  | Tokushima  | 15.4 | 13.1 | 1970 | 11.67 | 11.32 | 11.00 | 10.67 | 10.34 | 8.70  |
| 37  | Kagawa     | 15.4 | 13.4 | 2046 | 11.69 | 11.35 | 11.03 | 10.70 | 10.39 | 8.76  |
| 38  | Ehime      | 15.5 | 13.5 | 1911 | 11.68 | 11.34 | 11.04 | 10.72 | 10.39 | 8.78  |
| 39  | Kochi      | 15.9 | 14.0 | 2104 | 11.70 | 11.39 | 11.10 | 10.80 | 10.50 | 9.03  |
| 40  | Fukuoka    | 15.7 | 12.8 | 1835 | 11.66 | 11.31 | 10.99 | 10.63 | 10.29 | 8.59  |
| 41  | Saga       | 15.4 | 13.1 | 1876 | 11.67 | 11.34 | 11.01 | 10.68 | 10.34 | 8.69  |
| 42  | Nagasaki   | 15.9 | 13.1 | 1874 | 11.67 | 11.34 | 11.00 | 10.68 | 10.34 | 8.69  |
| 43  | Kumamoto   | 15.7 | 13.2 | 1926 | 11.68 | 11.34 | 11.02 | 10.70 | 10.37 | 8.74  |
| 44  | Oita       | 15.1 | 13.0 | 1908 | 11.67 | 11.33 | 11.02 | 10.68 | 10.33 | 8.69  |
| 45  | Miyazaki   | 16.4 | 13.8 | 2034 | 11.70 | 11.40 | 11.08 | 10.77 | 10.47 | 8.98  |
| 46  | Kagoshima  | 17.3 | 13.4 | 1880 | 11.69 | 11.36 | 11.04 | 10.74 | 10.41 | 8.84  |
| 47  | Okinawa    | 22.3 | 13.8 | 1775 | 11.69 | 11.39 | 11.09 | 10.76 | 10.44 | 8.90  |

TMP: Annual mean temperature (°C)

SOLA: Annual mean solar radiation (MJ/m<sup>2</sup>/day)

SUN: Annual total sunshine duration (h/year)

1000-10000: Annual mean effective day length at 1000-10000 lx (h/day)
